# Supplementary material
Source: PubMed Central journal article supplement (PMC2830611)

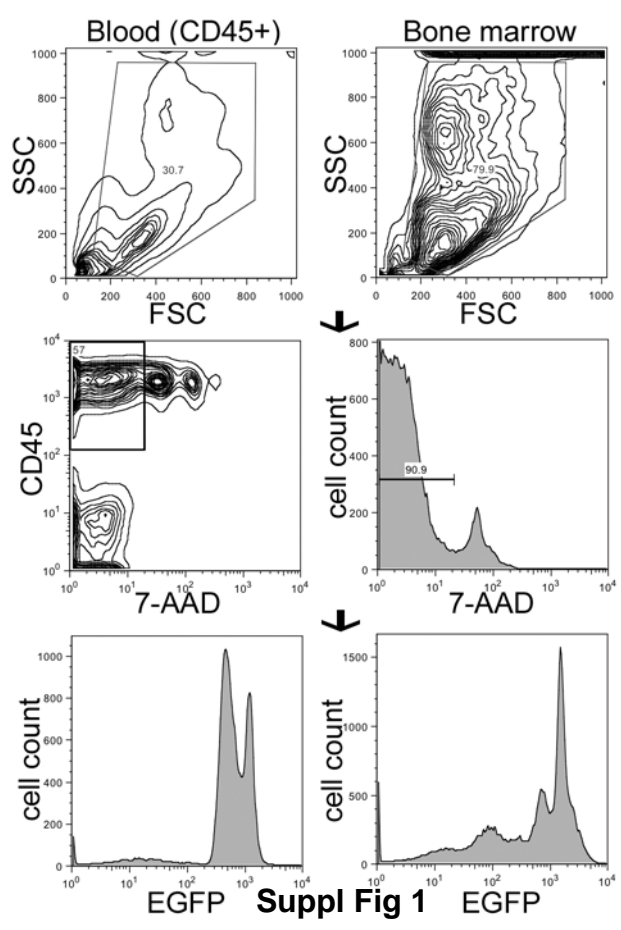

Suppl Fig 1

Supplement: NIHMS179936-supplement-Suppl_Fig_1.pdf [file NIHMS179936-supplement-Suppl_Fig_1.pdf]
